# Supplementary material for: Facially amphiphilic skeleton-derived antibacterial crown ether/silver ion complexes
Source: Royal Society of Chemistry journal article supplement (doi:10.1039/d4sm01192a), 2025-01-01
Supplement: d4sm01192a1.pdf [file d4sm01192a1.pdf]

*Electronic Supplementary Information*

## Facially amphiphilic skeleton-derived antibacterial crown ether/silver ion complexes

Qingsheng Wang,<sup>a</sup> Wen Huang,<sup>b</sup> Qian Sun,<sup>b</sup> Mengqi Le,<sup>b</sup> Lili Cai,<sup>c\*</sup> Yong-Guang Jia<sup>d\*</sup>

<sup>a</sup>Orthopedics Department, General Hospital of Pingmei Shenma Group, Pingdingshan 467000, China;

<sup>b</sup>School of Materials Science and Engineering, South China University of Technology, Guangzhou 510641, China;

<sup>c</sup>School of Life Science, Zhuhai College of Science and Technology, Zhuhai 519040, China

<sup>d</sup>Center for Advanced Materials Research, Beijing Normal University, Zhuhai 519087, China

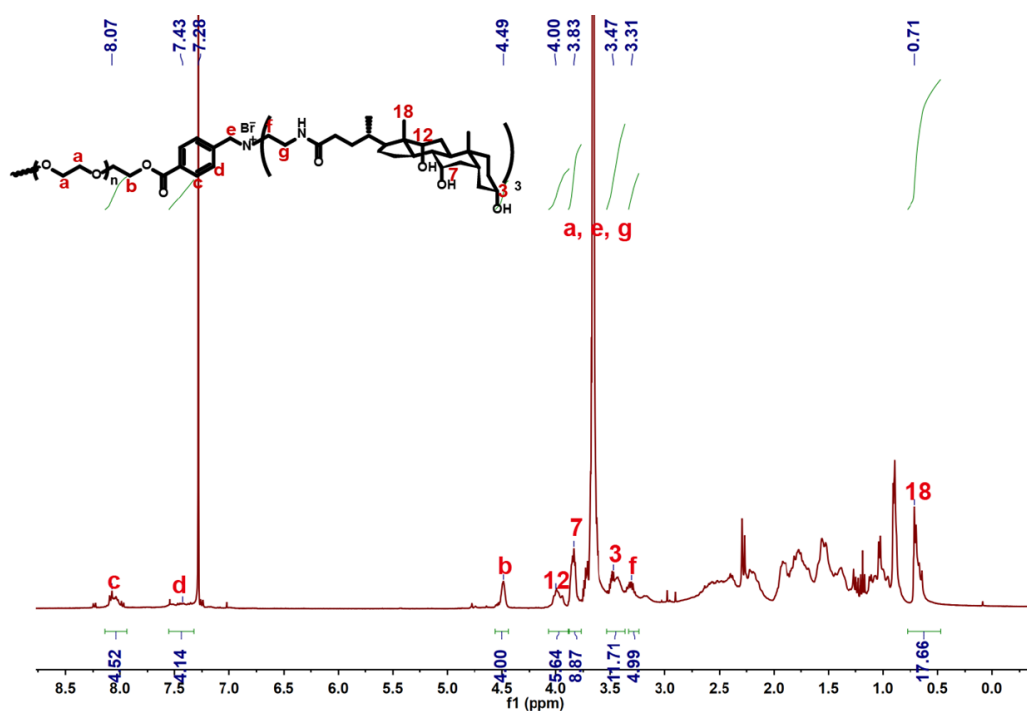

Figure S1. <sup>1</sup>H-NMR spectrum of D-CA<sub>6</sub> in CDCl<sub>3</sub> and its integral labels of characteristic peaks.

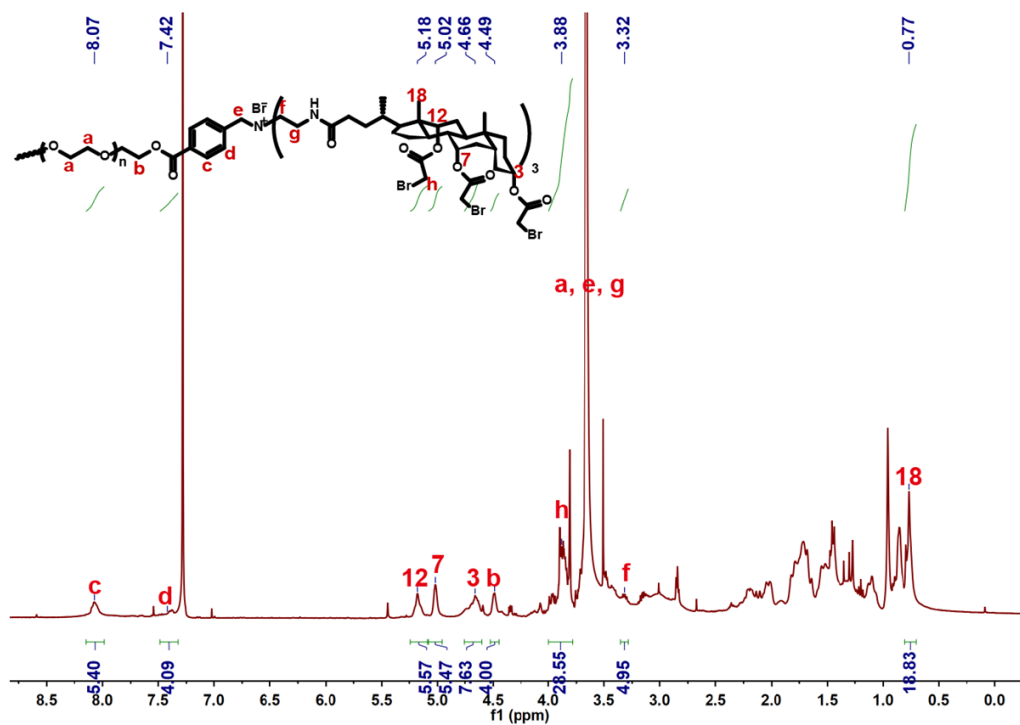

Figure S2. <sup>1</sup>H-NMR spectrum of D-CA<sub>6</sub>-Br in CDCl<sub>3</sub> and its integral labels of characteristic peaks.

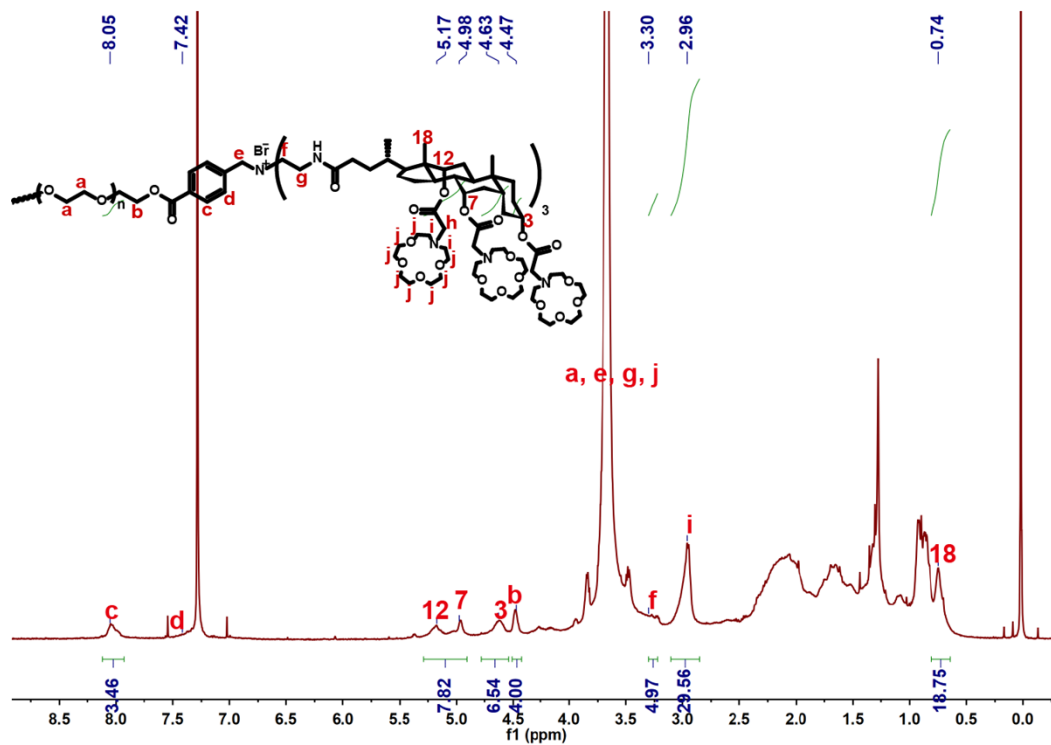

Figure S3. <sup>1</sup>H-NMR spectrum of D-CA<sub>6</sub>-CE in CDCl<sub>3</sub> and its integral labels of characteristic peaks.

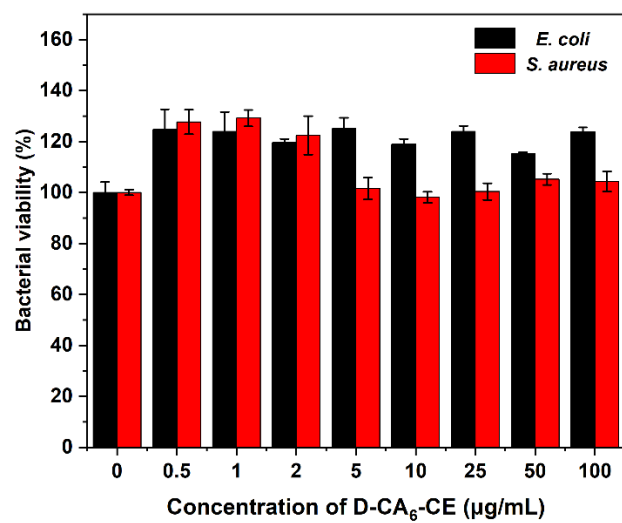

Figure S4. The antibacterial viabilities of D-CA<sub>6</sub>-CE against *E. coli* and *S. aureus*.
